# Supplementary material
Source: PubMed Central journal article supplement (PMC7033372)
Supplement: bloodBLD2019003487-suppl1.pdf [file bloodBLD2019003487-suppl1.pdf]

**Supplementary Table 1.** Potentially pathogenic missense mutations in *PRF1* identified in the ASPREE cohort, and the predicted frequency of their co-inheritance with A91V or as homozygotes in 13,1313 participants of the ASPREE study.

| Mutation RefSNP       | A.A. substitution | Alleles,     | A91V/mut,    | mut/mut,     |
|-----------------------|-------------------|--------------|--------------|--------------|
|                       |                   | observed, N= | predicted N= | predicted N= |
| rs141660796           | R28C              | 15           | 0.290439     | 0.004284     |
| rs377367451           | P382S             | 11           | 0.212988     | 0.002304     |
| rs145463632           | G334S             | 10           | 0.193626     | 0.001904     |
| rs144242324           | A401V             | 10           | 0.193626     | 0.001904     |
| rs528937278           | P22L              | 6            | 0.116175     | 0.000685     |
| rs147051158           | A27T              | 6            | 0.116175     | 0.000685     |
| rs139336186           | R123H             | 5            | 0.096813     | 0.000476     |
| rs779192397           | E30A              | 4            | 0.077450     | 0.000305     |
| rs142059134           | G71S              | 4            | 0.077450     | 0.000305     |
| rs140281371           | R225Q             | 3            | 0.058088     | 0.000171     |
| rs770354747           | N205S             | 3            | 0.058088     | 0.000171     |
| rs759235360           | G198R             | 2            | 0.038725     | 0.000076     |
| rs774503938           | R177H             | 2            | 0.038725     | 0.000076     |
| rs376289273           | P389S             | 2            | 0.038725     | 0.000076     |
| rs201468340           | R177C             | 2            | 0.038725     | 0.000076     |
| rs144892262           | G548E             | 2            | 0.038725     | 0.000076     |
| rs577367079           | D469G             | 2            | 0.038725     | 0.000076     |
| rs374588624           | R373C             | 2            | 0.038725     | 0.000076     |
| rs140787739           | R357Q             | 2            | 0.038725     | 0.000076     |
| rs749729753           | G399V             | 2            | 0.038725     | 0.000076     |
| rs751247865           | H222Q             | 1            | 0.019363     | 0.000019     |
| rs189650890           | T450M             | 1            | 0.019363     | 0.000019     |
| rs12263572            | V135M             | 1            | 0.019363     | 0.000019     |
| rs144024245           | R96W              | 1            | 0.019363     | 0.000019     |
| rs775966864           | T250M             | 1            | 0.019363     | 0.000019     |
| rs201909472           | V38M              | 1            | 0.019363     | 0.000019     |
| rs1031096686          | T136S             | 1            | 0.019363     | 0.000019     |
| rs760962796           | V482F             | 1            | 0.019363     | 0.000019     |
| rs765636779           | H144R             | 1            | 0.019363     | 0.000019     |
| rs902612105           | E275K             | 1            | 0.019363     | 0.000019     |
| rs776571416           | G220S             | 1            | 0.019363     | 0.000019     |
| rs754079962           | D340N             | 1            | 0.019363     | 0.000019     |
| rs150628656           | T289M             | 1            | 0.019363     | 0.000019     |
| rs776657932           | C76Y              | 1            | 0.019363     | 0.000019     |
| <i>rs753604724</i>    | <i>G230D</i>      | <i>1</i>     | 0.019363     | 0.000019     |
| rs564234285           | D134E             | 1            | 0.019363     | 0.000019     |
| rs779956870           | T404I             | 1            | 0.019363     | 0.000019     |
| rs146414576           | Q209P             | 1            | 0.019363     | 0.000019     |
| rs745902829           | K285del           | 1            | 0.019363     | 0.000019     |
| rs142403457           | A235V             | 1            | 0.019363     | 0.000019     |
| rs776338709           | V348L/M           | 2            | 0.019363     | 0.000019     |
| rs557951406           | R87H              | 1            | 0.019363     | 0.000019     |
| rs902124045           | R299C             | 1            | 0.019363     | 0.000019     |
| rs748060067           | R464Q             | 1            | 0.019363     | 0.000019     |
| rs201235771           | F316L             | 1            | 0.019363     | 0.000019     |
| rs753226704           | K285Q             | 1            | 0.019363     | 0.000019     |
| rs202216158           | F421L             | 1            | 0.019363     | 0.000019     |
| rs774503938           | R177H             | 1            | 0.019363     | 0.000019     |
| rs144024245           | R96W              | 1            | 0.019363     | 0.000019     |
| rs200383720           | H182R             | 1            | 0.019363     | 0.000019     |
| rs781070813           | R87C              | 1            | 0.019363     | 0.000019     |
| <i>rs145513232</i>    | <i>E447Q</i>      | <i>1</i>     | 0.019363     | 0.000019     |
| rs751467331           | H35Q              | 1            | 0.019363     | 0.000019     |
| rs141864315           | V453M             | 1            | 0.019363     | 0.000019     |
| rs201032696           | R55C              | 1            | 0.019363     | 0.000019     |
| rs763667216           | I266T             | 1            | 0.019363     | 0.000019     |
| rs755578676           | R297W             | 1            | 0.019363     | 0.000019     |
| rs200641752           | P345S             | 1            | 0.019363     | 0.000019     |
| rs370935432           | R123C             | 1            | 0.019363     | 0.000019     |
| rs756992644           | L92F              | 1            | 0.019363     | 0.000019     |
| rs766899179           | R96Q              | 1            | 0.019363     | 0.000019     |
| TOTAL EXPECTED NUMBER |                   |              | 2.691        | 0.80         |

Shown in *italics* are novel mutations in *PRF1*.
